# Supplementary material for: Synergism of a novel MCL-1 downregulator, acriflavine, with navitoclax (ABT-263) in triple-negative breast cancer, lung adenocarcinoma and glioblastoma multiforme
Source: PubMed Central journal article supplement — Int J Oncol. 2021 Dec 8;60(1):2. doi: 10.3892/ijo.2021.5292 (PMC8698747; doi:10.3892/ijo.2021.5292), 2021-12-08

Figure S1. Effect of ACF on cell survival. (A) U87, U251, U343, A549 and NCI-H69 cells were treated with various concentrations (0, 1, 2 and 10  $\mu\text{M}$ ) of ACF and cell viability was determined using the sulforhodamine B assay. (B) U87, U343, U251 and A549 cells were treated with ACF (2  $\mu\text{M}$ ) for 24 h and cell death was evaluated using Annexin V and 7-AAD staining followed by FACS. APC conjugated anti-human IgG was used as an isotype control. ACF, acriflavine; 7-AAD, 7-amino-actinomycin D; ISO, isotype control.

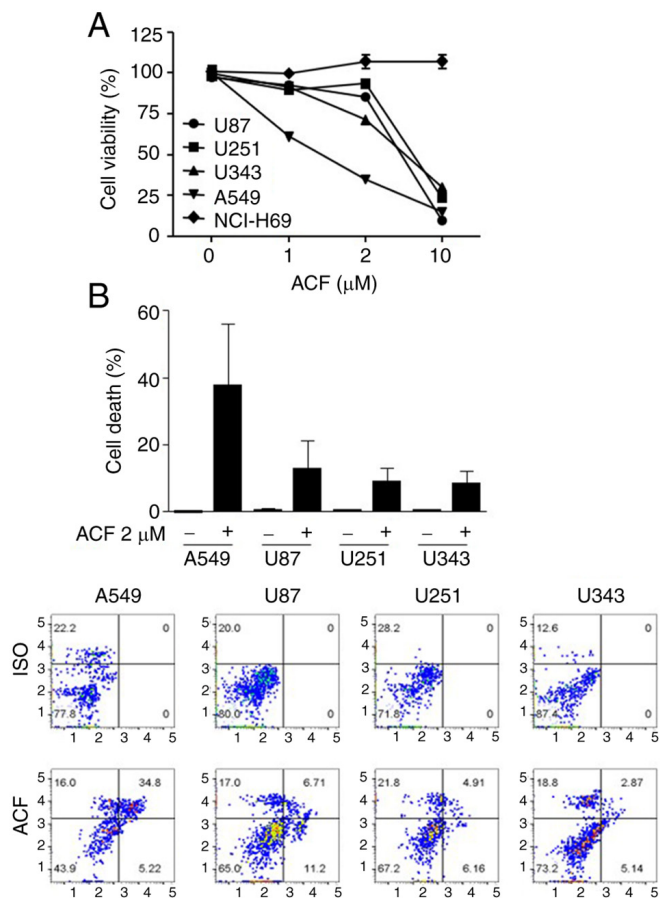

Figure S2. ACF-induced apoptosis is dependent on caspase-9 in triple-negative breast cancer and lung cancer cell lines. MDA-MB-231, HS578T and A549 cells were treated with 0 or 10  $\mu$ M ACF for 24 h, and the expression of caspase-8 and caspase-9 was detected using western blot analysis. ACF, acriflavine.

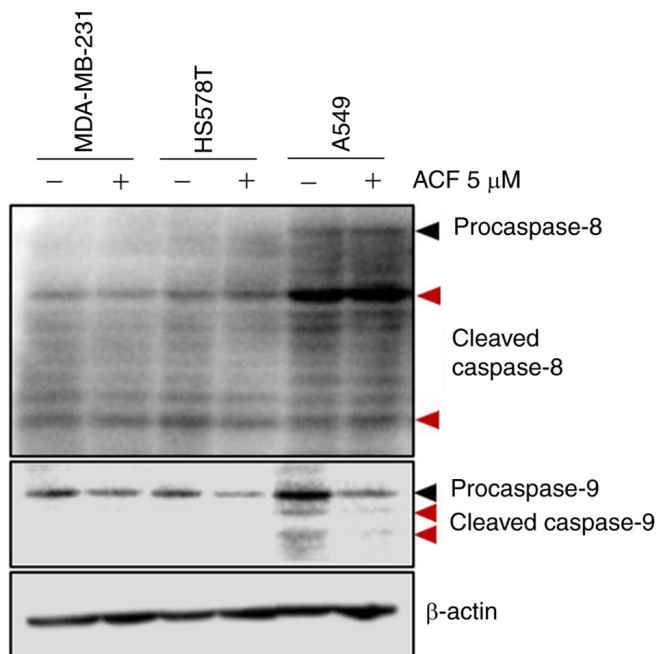

Figure S3. ACF downregulates MCL-1 in normoxia. MDA-MB-231, HS578T and HCC-70 cells were cultured in  $\text{CoCl}_2$  ( $600 \mu\text{M}$ )-induced normoxic or in hypoxic conditions. The hypoxic condition was induced with  $\text{CoCl}_2$  ( $600 \mu\text{M}$ ). Cells cultured in normal normoxic conditions were treated with 0 or  $10 \mu\text{M}$  of ACF for 24 h and determination of the expression of MCL-1 was performed using western blot analysis. ACF, acriflavine; MCL-1, myeloid cell leukemia sequence 1; p-, phosphorylated.

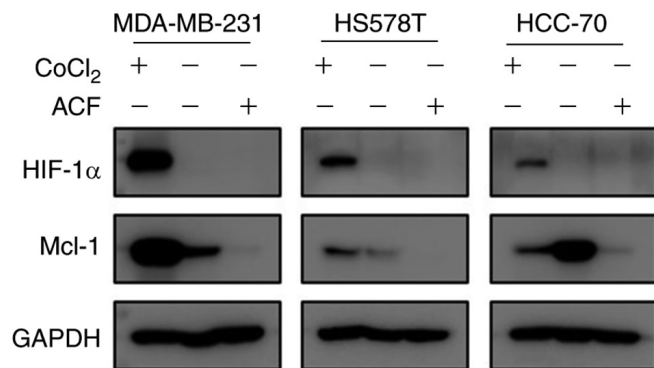

Figure S4. MCL-1 downregulation by ACF is independent of GSK3 $\beta$ . MDA-MB-231, HS578T and HCC-70 cells were treated with 0 or 10  $\mu$ M ACF for 24 h, and determination of the expression of p-GSK-3 $\beta$ , GSK-3 $\beta$ , p-MCL-1 and MCL-1 was performed using western blot analysis. MCL-1, myeloid cell leukemia sequence 1; ACF, acriflavine; p-, phosphorylated.

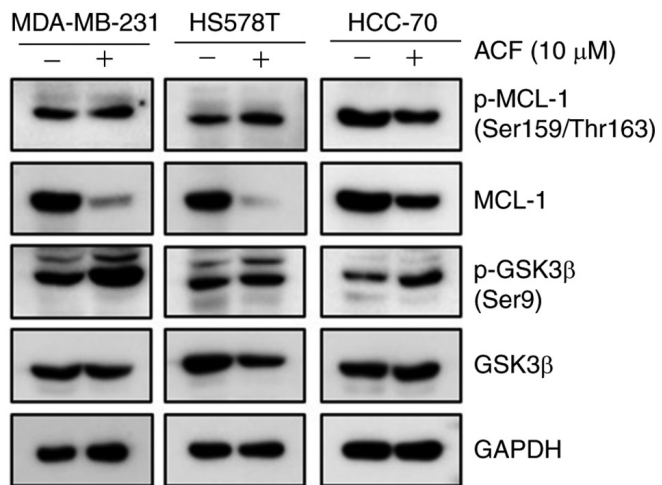

Figure S5. CI reveals a synergistic effect in triple-negative breast cancer, glioblastoma multiforme and lung cancer cell lines. CI of acriflavine and ABT-263 treatment on MDA-MB-231, HS578T, HCC-70, U87, U251, U343 and A549 cells was plotted using CompuSyn software.  $CI < 1$  indicates a synergistic effect,  $CI = 1$  indicates an additive effect and  $CI > 1$  indicates an antagonistic effect. CI, Combination index; ACF, acriflavine.

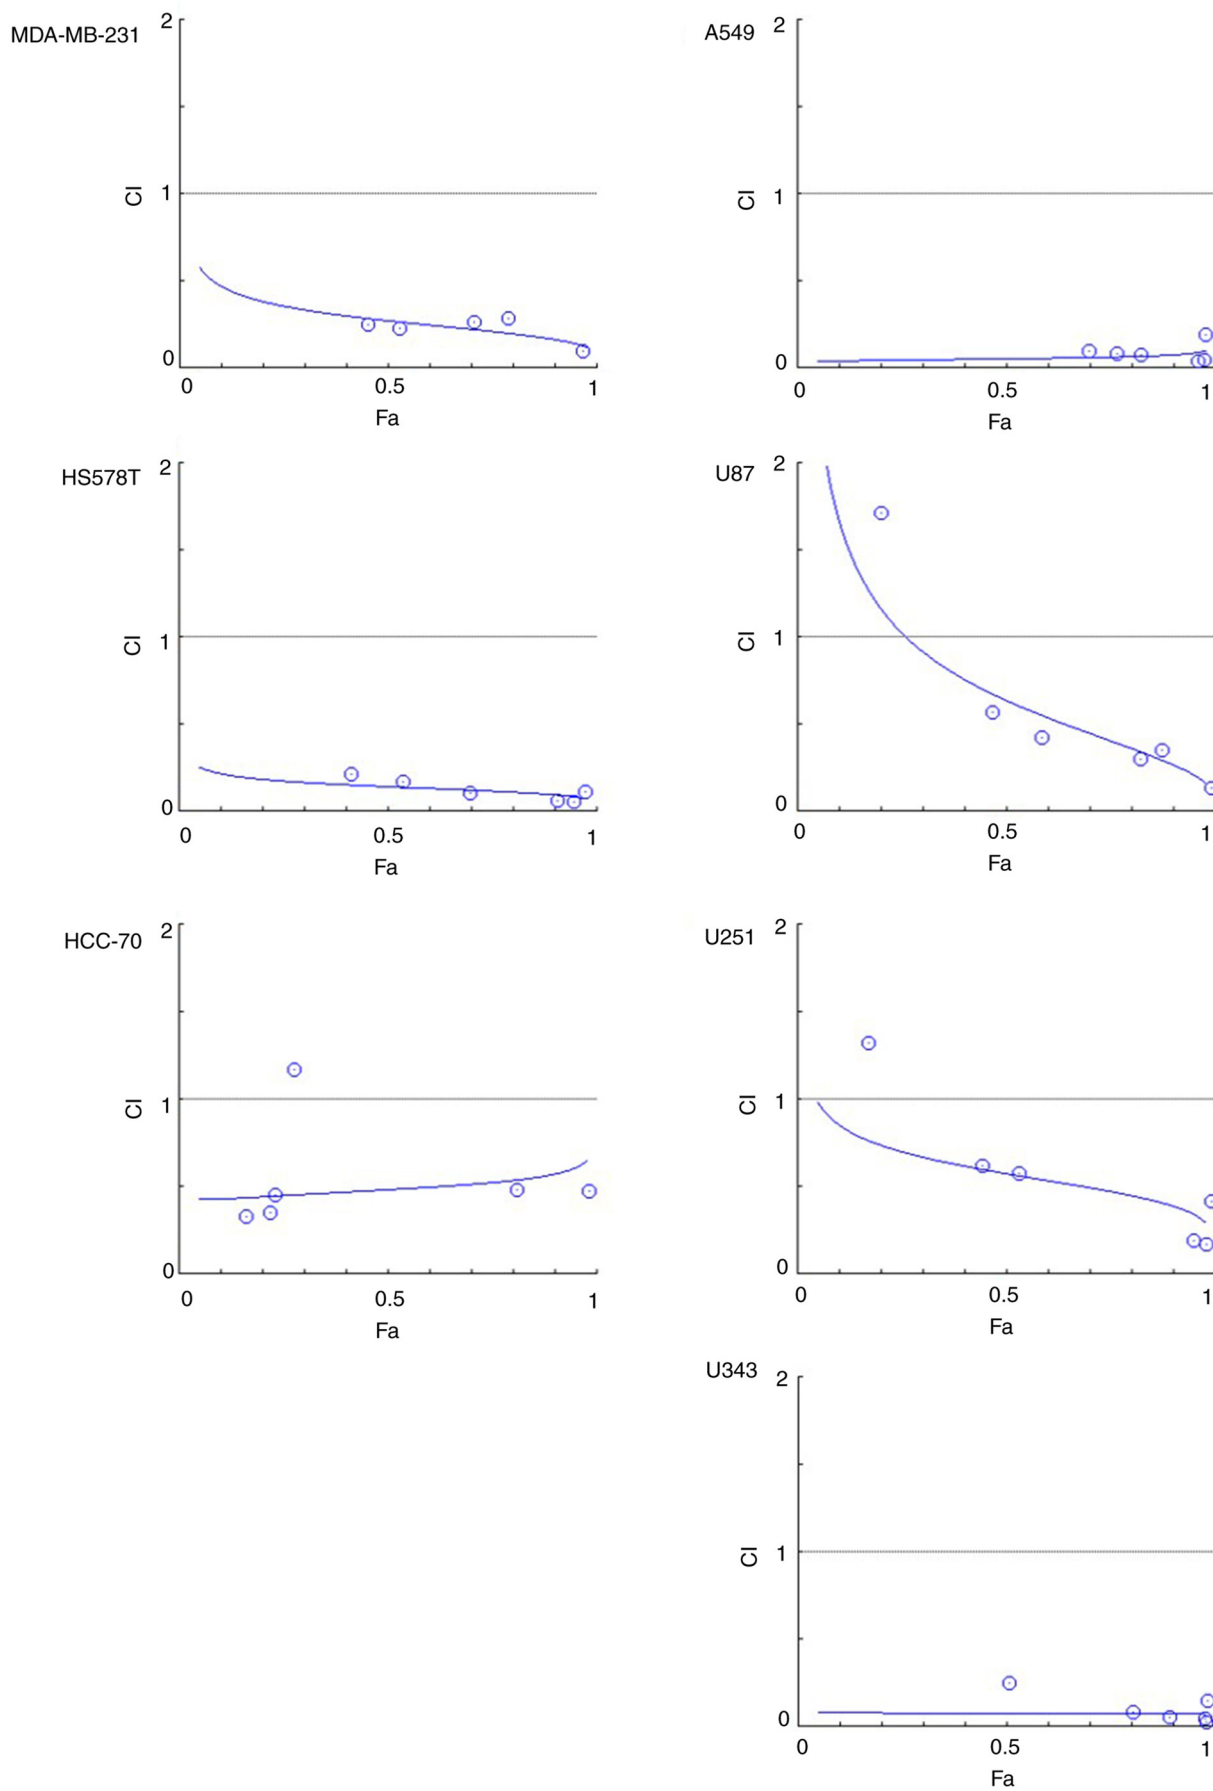

Supplement: Supplementary_Data.pdf [file Supplementary_Data.pdf]
